# Supplementary material for: Serum biomarkers as early indicators of outcomes in spontaneous subarachnoid hemorrhage
Source: publisher site journal article supplement (doi:10.1515/cclm-2025-0309), 2025-05-27
Supplement: Supplementary file 1 [file j_cclm-2025-0309_suppl_001.docx]

**Platforms assessed for serum biomarkers**

NSE: Elecsys NSE Kit (Roche Diagnostic), ECLIA by Modular Cobas E801 analyzer. The cut-off is 16.3 ng/mL. The measurement range is 0.07 – 300.0 ng/mL. The CV intrassay and interassay at 12.9 ng/mL level are 5.0 % and 8.0 %, respectively.

S100: Elecsys S100 Kit (Roche Diagnostic), ECLIA by Modular Cobas E801 analyzer. The cut-off is 0.10 μg/L. The measurement range is 0.02 – 30.0 μg/L. The CV intrassay and interassay at 0.10 μg/L level are 3.0 % and 5.0 %, respectively.

sST2: Sequent-IA Test ST2 Kit (Critical Diagnostics), turbidimetric immunoassay, performed on the Atellica CH analyzer (Siemens Healthineers). The cut-off is 35 ng/mL. The measurement range is 8-360 ng/mL. The CV intrassay and interassay at 20.6 ng/ml level are 7.0 % and 10.5 %, respectively.

suPAR: Suparnostic Kit (Virogates DK), turbidimetric immunoassay, performed on the Atellica CH analyzer (Siemens Healthineers). The cut-off is 3.0 ng/mL. The measurement range is 1.7 - 26.5 ng/mL. The CV intrassay and interassay at 3.1 ng/mL level are 3.0 % and 4.1 %, respectively.

GFAP: Reagent Kit (Abbott), CMIA, by Alinity *i series* automated platform (Abbott Laboratories). The cut-off for traumatic brain injury is 35.0 pg/mL. The linearity range is 6.1 – 42000.0 pg/mL. The CV intrassay and interassay at 25.9 pg/mL level are 2.5 % and 5.0 %, respectively.

UCHL-1: Reagent Kit (Abbott), CMIA, by Alinity *i series* automated platform (Abbott Laboratories). The cut-off for traumatic brain injury is 400.0 pg/mL. The linearity range is 26.3 – 25000.0 pg/mL. UCHL-1. The CV intrassay and interassay at 247.9 pg/mL level are 3.5 % and 5.5 %, respectively.

**Table 1. Serum biomarkers levels at 24 hours from sSAH and established cut-off values.**

| **BIOMARKERS** | **CUT-OFF** | **MIN** | **MAX** | **MEAN** | **MEDIAN** | **SD** |
| --- | --- | --- | --- | --- | --- | --- |
| **suPAR**  (ng/mL) | < 3.0 | 1.7 | 17.4 | 3.9 | 3.7 | 2.1 |
| **NSE**  (ng/mL) | < 16.3 | 4.1 | 57.6 | 13.1 | 11.0 | 8.4 |
| **S100**  (μg/L) | < 0.10 | 0.02 | 6.6 | 0.5 | 0.2 | 1.0 |
| **sST2**  (ng/mL) | < 35.0 | 9.0 | 360.0 | 147.5 | 136.0 | 103.0 |
| **GFAP**  (pg/mL) | < 35.0 | 5.5 | 42000.0 | 4319.9 | 841.3 | 9395.0 |
| **UCH-L1**  (pg/mL) | < 400.0 | 43.3 | 2116.3 | 300.7 | 166.3 | 357.5 |
